# Supplementary figures and images for: Development and characterization of a scintillating cell imaging dish for radioluminescence microscopy
Source: Royal Society of Chemistry journal article supplement (doi:10.1039/c8an00106e), 2018-01-01

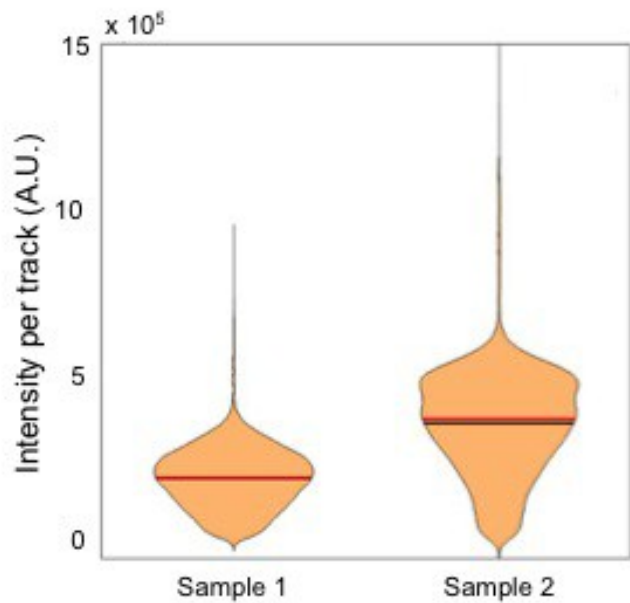

Supplement: c8an00106e2.pdf [file c8an00106e2.pdf]

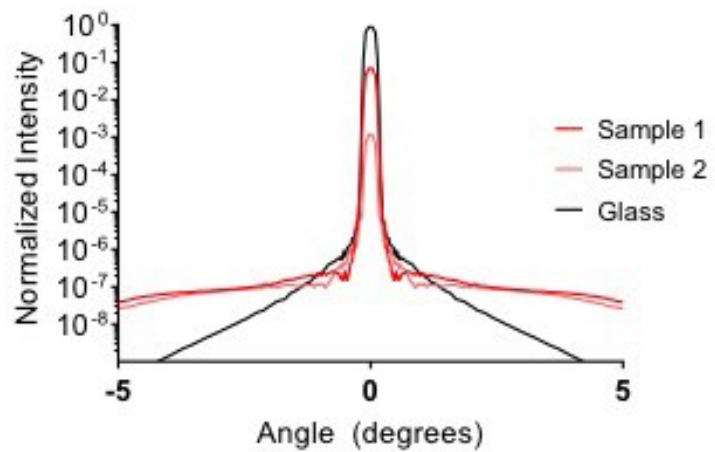

Supplement: c8an00106e3.pdf [file c8an00106e3.pdf]
